# Supplementary material
Source: PubMed Central journal article supplement (PMC5554545)
Supplement: NIHMS856749-supplement-Supplementary_Materials.pdf [file NIHMS856749-supplement-Supplementary_Materials.pdf]

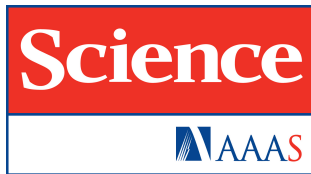

## Supplementary Materials for

ER-mitochondria contacts couple mtDNA synthesis with mitochondrial  
division in human cells

Samantha C. Lewis, Lauren F. Uchiyama, and Jodi Nunnari

correspondence to: [jmnunnari@ucdavis.edu](mailto:jmnunnari@ucdavis.edu)

**This PDF file includes:**

Figs. S1 to S7

Figure S1

**A**

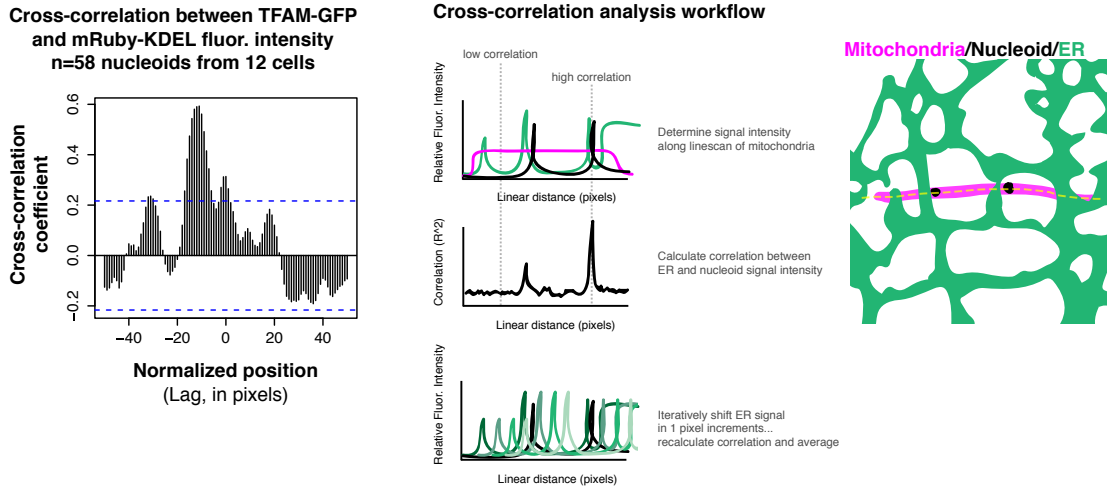

**B**

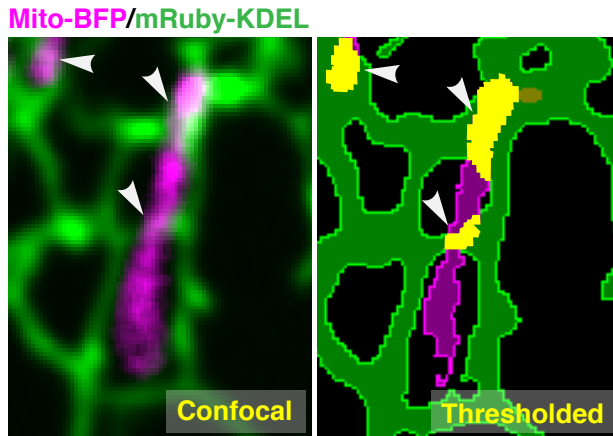

**C**

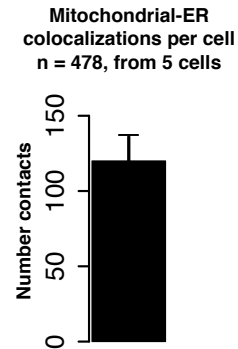

**Fig. S1. Dynamics of ER-mitochondria colocalized regions in live mammalian cells**  
(A) Spatial cross-correlation analysis of nucleoid (TFAM-GFP) and ER (mRuby-KDEL) fluorescence intensity along linescans of mitochondria (n=58) labeled with Mito-BFP in live U2OS cells. Blue dotted lines indicate 95% confidence interval cut-offs. (B) Left, example merged image of a mitochondrion labeled with Mito-BFP (magenta) and ER labeled with mRuby-KDEL (green) from a live U2OS cell. Right, thresholded image from (A), arrows indicate colocalization regions identified for automated tracking (yellow). (C) Quantification of “stable” mitochondria-ER colocalizations (persistent for 5 minutes) per U2OS cell identified via thresholding as in (B).

Figure S2

**A**

POLG2-GFP/Mito-mCherry

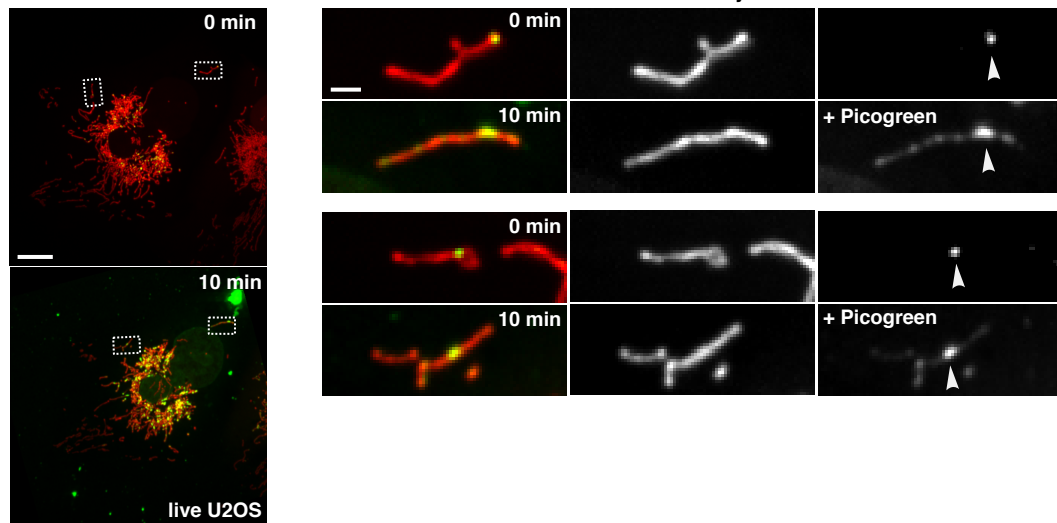

**B**

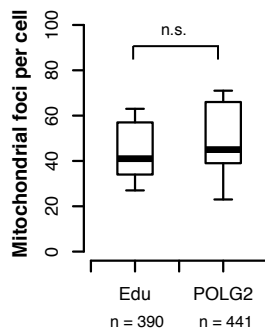

**C**

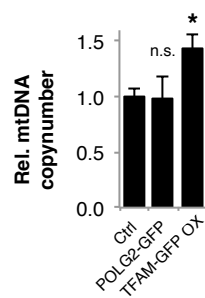

**Fig. S2 POLG2-GFP is a faithful reporter for mtDNA replication in cells**

(A) Left panels: Additional representative image of a live U2OS cell co-expressing POLG2-GFP and mito-mCherry markers. Right panels: examples of individual mitochondria before (0 min) and after (10 min) Picogreen staining, demonstrating the presence of mtDNA foci which were not labeled by POLG2-GFP. (B) Boxplot demonstrating no significant difference in the number of Edu versus POLG2-GFP foci per U2OS cell, labeled as in Figure 2C. (C) Comparison of mtDNA copynumber in U2OS cells transfected with empty pcDNA3.1 vector (Ctrl), POLG2-GFP, or overexpressing TFAM-GFP (\* $p < .05$ , two-tailed t test from three biological replicates). Scale bars: 10  $\mu\text{m}$  (left), 2  $\mu\text{m}$  (right).

Figure S3

**A**

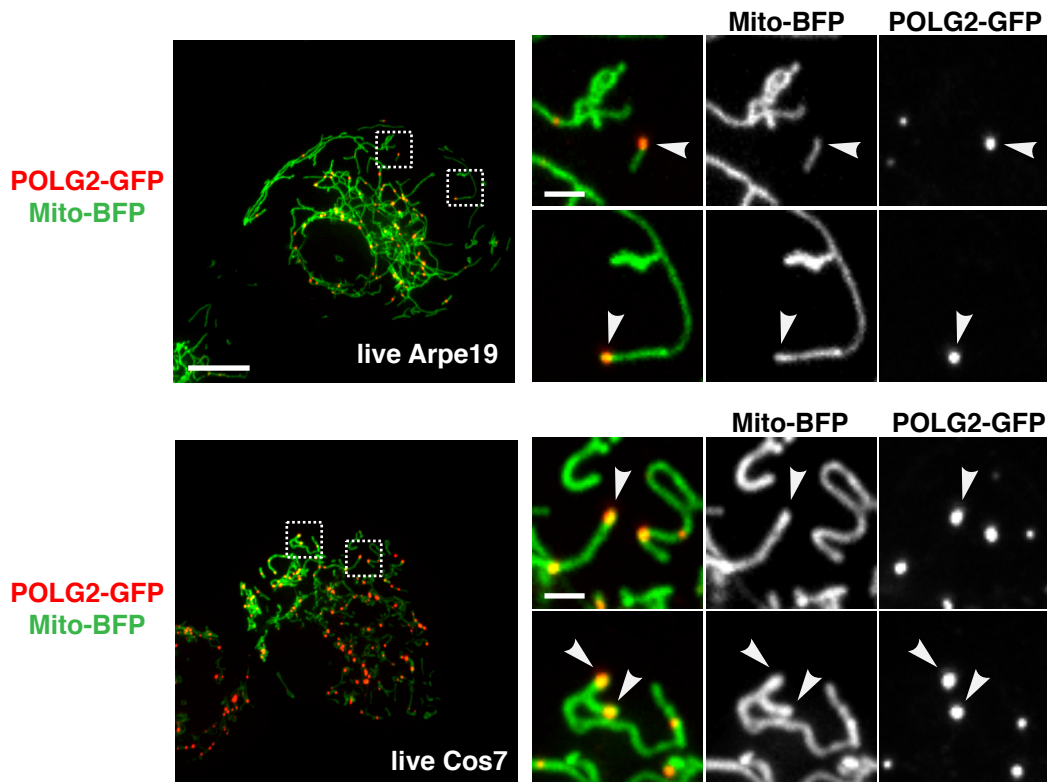

**B**

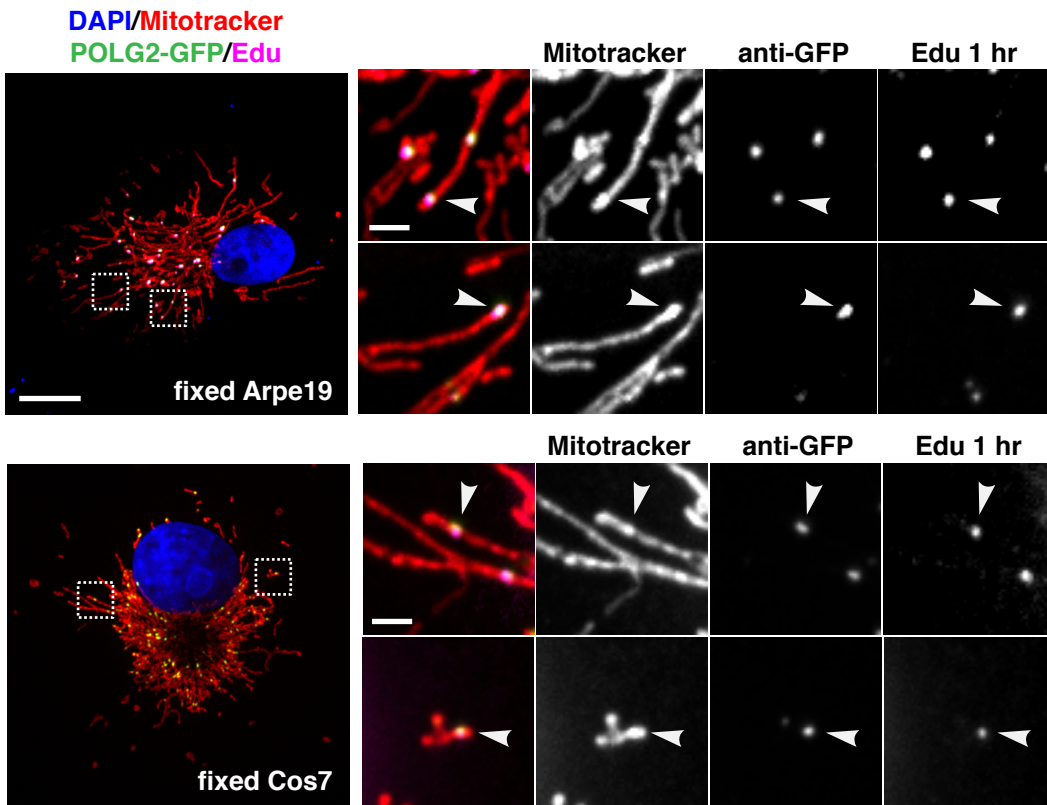

**Fig. S3 Nascent mtDNA is distributed to mitochondrial tips in live and fixed cells**

(A) Representative images of live Arpe19 (top panel) and Cos7 cells (bottom panel) co-expressing mito-BFP and POLG2-GFP. (B) Representative images of fixed Arpe19 (top panel) or Cos7 cells (bottom panel) transfected with POLG2-GFP and labeled with DAPI (DNA, blue), Mitotracker Red (mitochondria, red), anti-GFP AlexaFluor488 (POLG2-GFP, green) and Edu-AlexaFluor647 (replicating nucleoids, magenta). Scale bars: 10  $\mu$ m (full field view), 2  $\mu$ m (zoom).

Figure S4

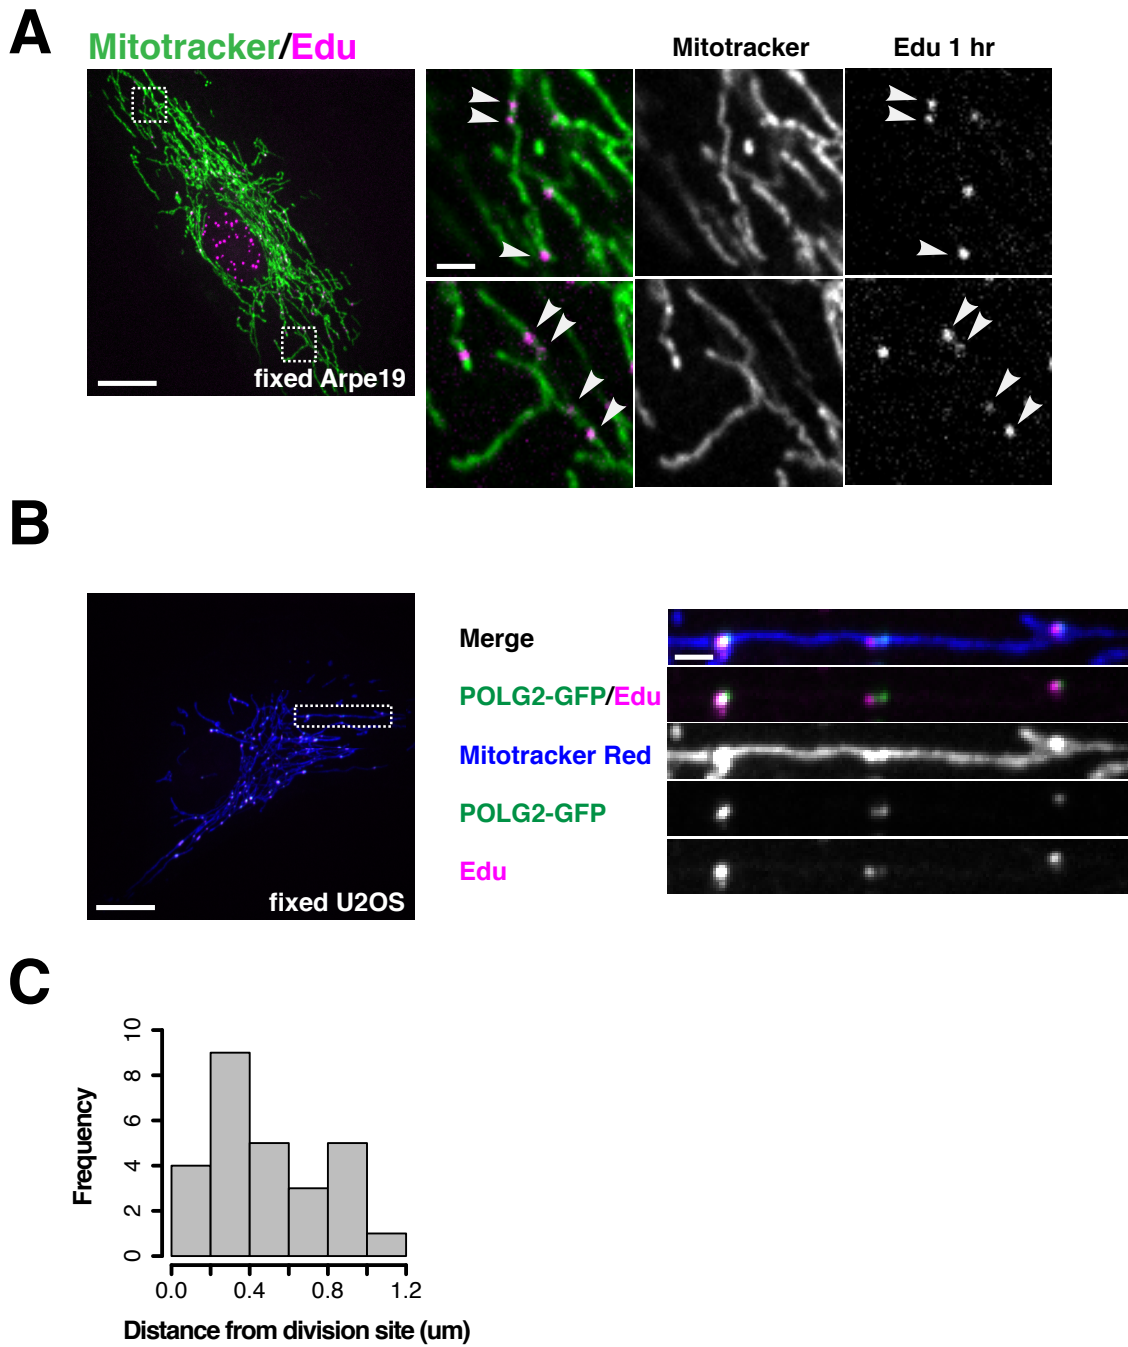

**Fig. S4 Segregating genomes are labeled by both Edu and POLG2-GFP**

Representative images of fixed Arpe19 cells labeled with Mitotracker Red (mitochondria, blue) and Edu-AlexaFluor647 (replicating nucleoids, magenta) demonstrating Edu focal pairs in unbranched organelle (top panels), or an branched organelle (bottom panels). (B) Representative image of a fixed Arpe19 cell previously transfected with POLG2-GFP

and labeled with Mitotracker Red (mitochondria, blue), anti-GFP AlexaFluor488 (POLG2-GFP, green) and Edu-AlexaFluor647 (replicating nucleoids, magenta), demonstrating an Edu focal pair. (C) Histogram indicating the proximity of division sites to the center of POLG2-GFP foci in live U2OS cells, in microns. Scale bars: 10 um (full field view), 2 um (zoom).

Figure S5

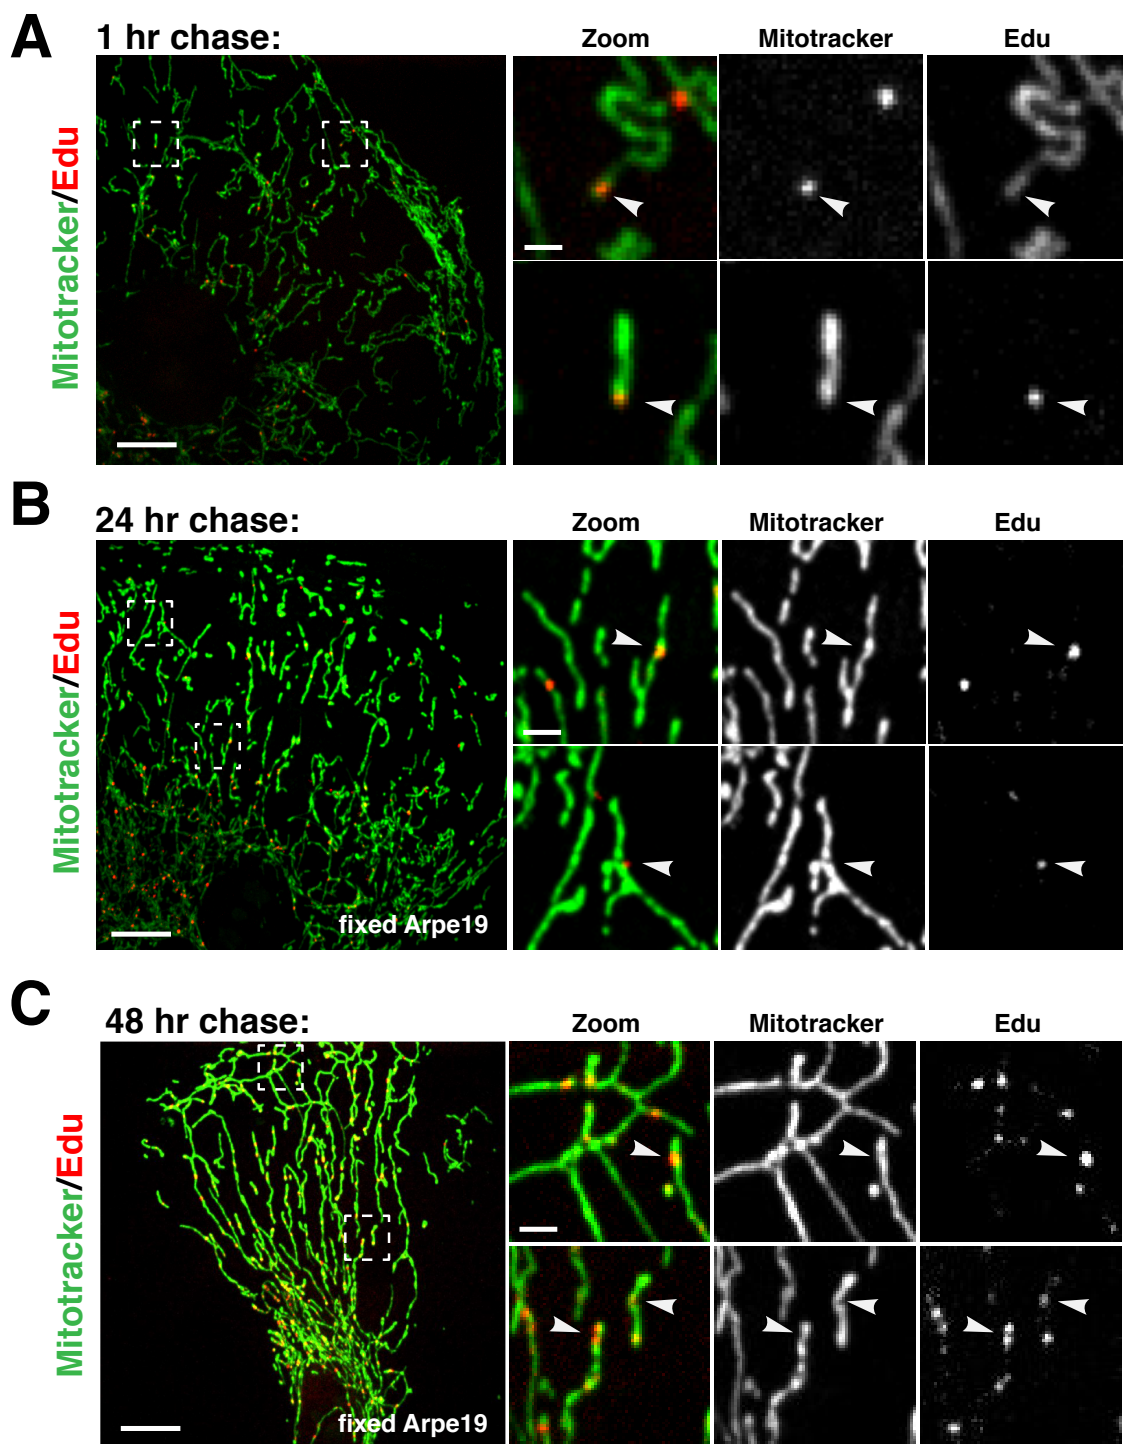



**Fig. S5 Edu pulse-chase of mtDNA in Arpe19 cells**

Representative images of Arpe19 cells labeled with Mitotracker Red (mitochondria, in green) and pulse-labeled with Edu (replicating nucleoids, red) for 1 hour as described in the text, then chased in Edu-free media for 1 hour (A), 24 hours (B), or 48 hours (C). Arrows indicate nascent mtDNA. Scale bars: (A-C) 10  $\mu$ m (full field view), 2  $\mu$ m (zoom).

Figure S6

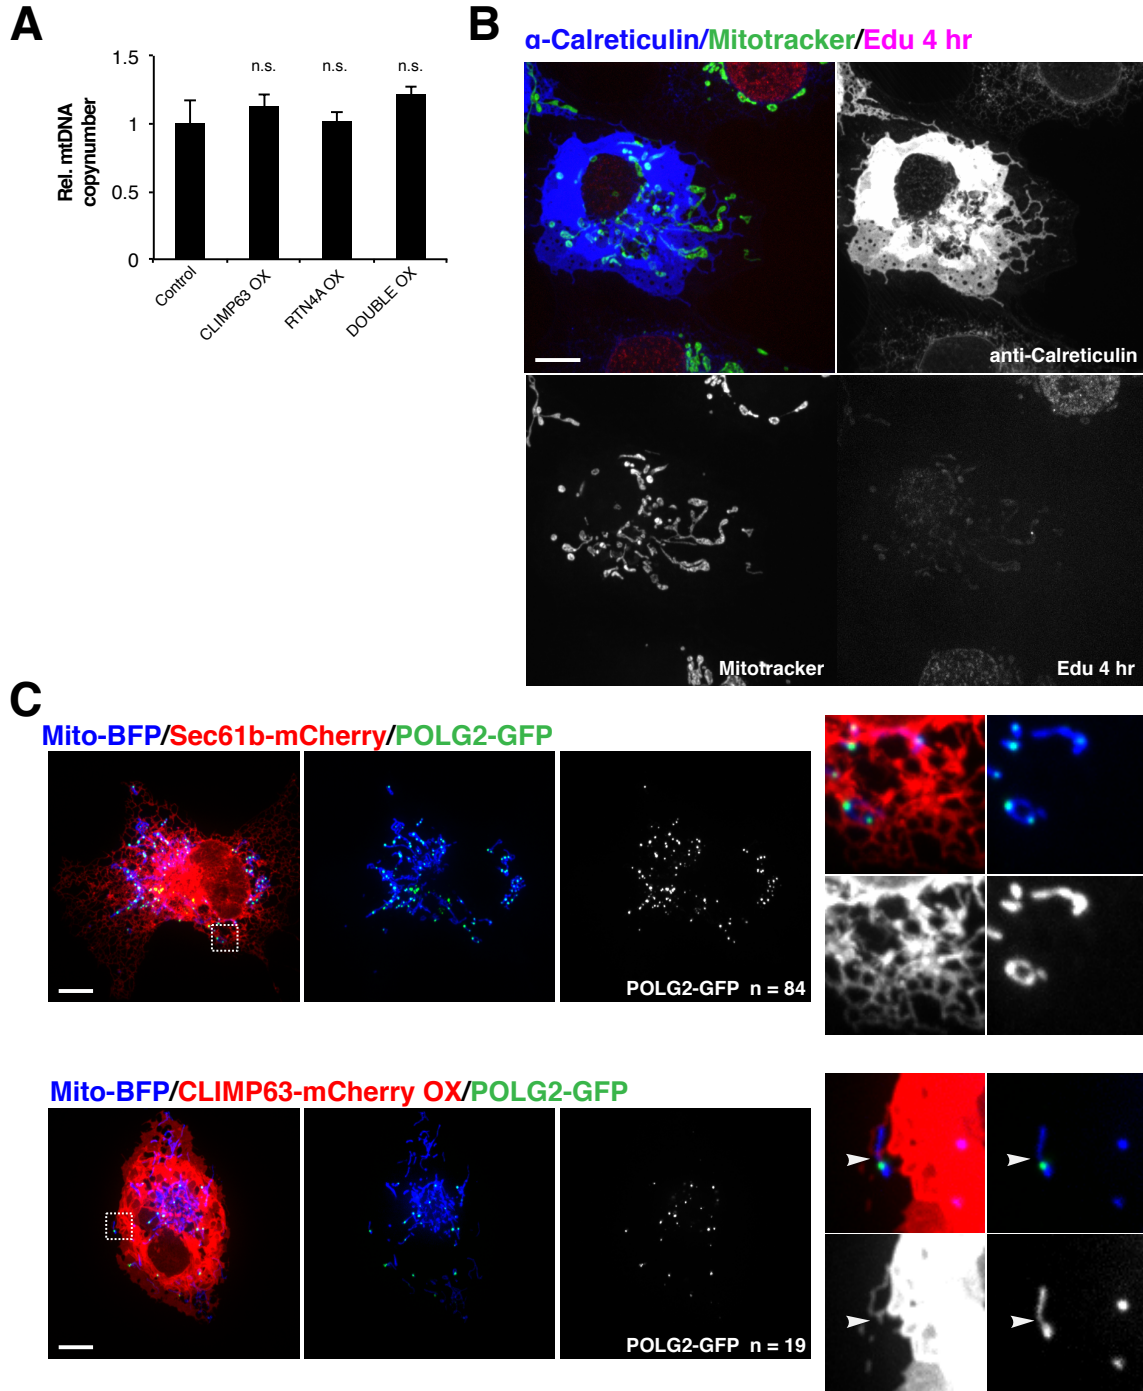

**Fig. S6 Replication initiation, but not mtDNA copy number, is linked to ER morphology**

(A) Comparison of mtDNA copy number in U2OS cells transfected with empty pcDNA3.1 vector (Control), CLIMP63-GFP, RTN4A-GFP, or both CLIMP63-GFP and

RTN4A-GFP (n.s.  $p > 0.05$ , two-tailed t test from three biological replicates). (B) Full field views of Cos7 cell overexpressing CLIMP63-mCherry from Figure 4D showing anti-Calreticulin, Mitotracker Red and Edu signal. (C) Top, representative image of Cos7 cell co-expressing mito-BFP (mitochondria, blue), Sec61-mCherry (ER, red) and POLG2-GFP. Bottom, representative image of Cos7 cell co-expressing mito-BFP and POLG2-GFP and overexpressing CLIMP63-mCherry. Magnified regions shown at right; arrow indicates a residual tubular mitochondria-ER contact marked by a POLG2-GFP focus. Scale bars: (B-C) 10  $\mu\text{m}$  (full field view).

Figure S7

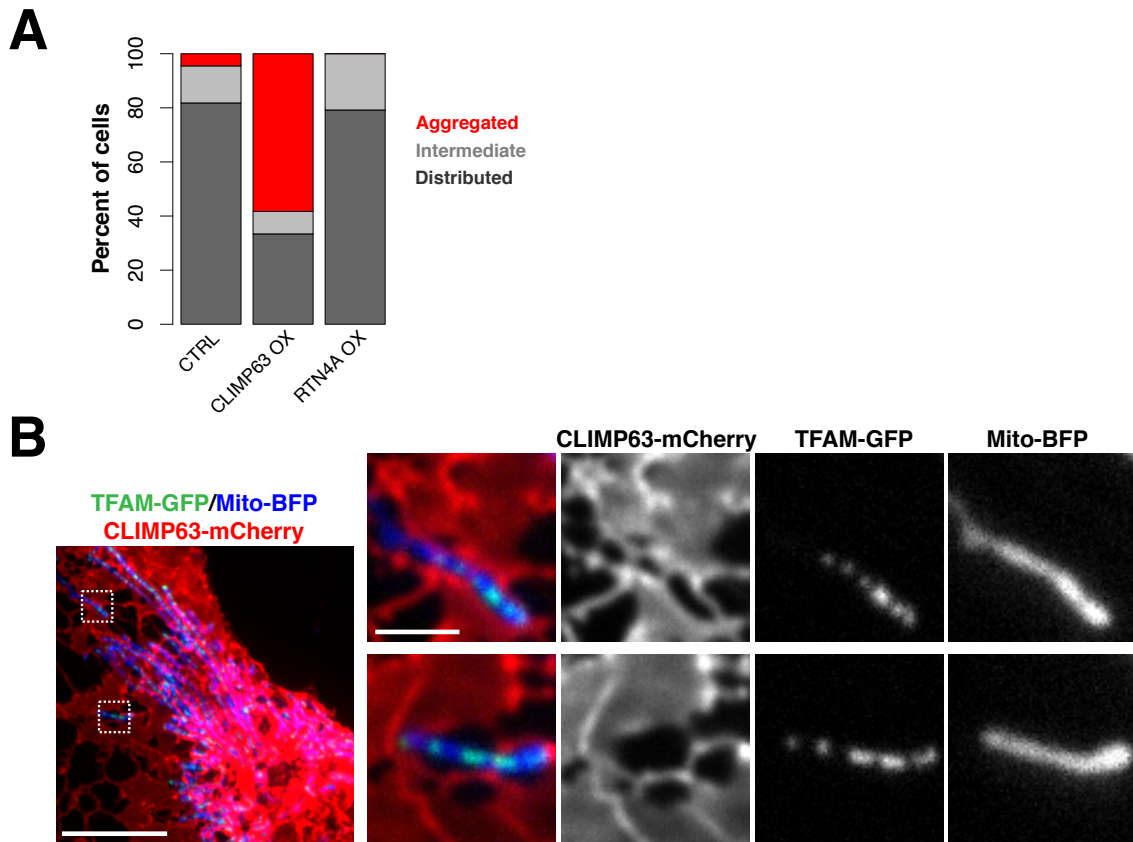

**Fig. S7 ER tubules are correlated with nucleoid distribution within mitochondria**

(A) Barplot indicating the extent of population-level nucleoid aggregation in live Cos7 cells overexpressing CLIMP63-mCherry, RTN4A-GFP, or both (CTRL). (B) Representative image of a live Cos7 cell overexpressing CLIMP63-mCherry (ER, red) and co-expressing TFAM-GFP (nucleoids, green) and mito-BFP (mitochondria, blue), showing residual tubular mitochondria-ER contacts adjacent to nucleoid foci. Scale bars: (B) 10  $\mu$ m (full field view), 2  $\mu$ m (zoom).
